# Supplementary material for: Genomics-Enabled Management of Genetic Resources in Radiata Pine
Source: MDPI journal article supplement (doi:10.3390/f13020282), 2022-02-10
Supplement: s1 [file s1]

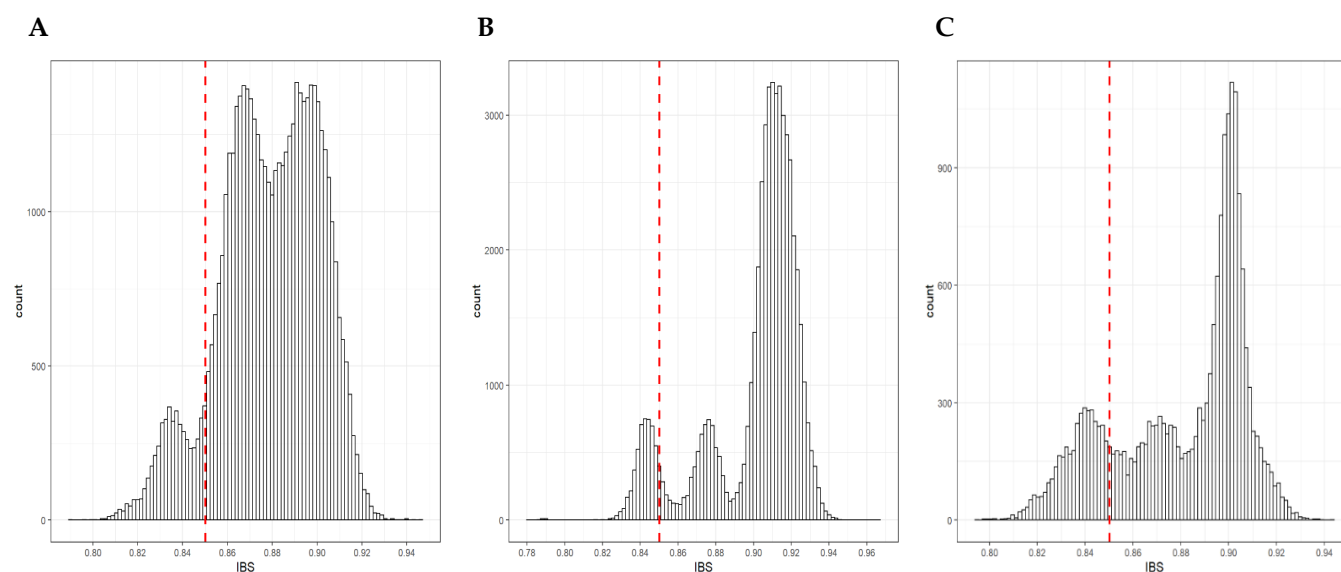

**Figure S1:** Distribution of identity by state (IBS) coefficients using different genotyping platforms. IBS coefficients for (1) trees genotyped using exome capture GBS (A), (2) trees genotyped using the Axiom NZPRAD02 genotyping array (B), and (3) trees genotyped using different platforms (C). The threshold separating unrelated trees from close relatives (IBS = 0.85) is shown as a red dashed line, while tri-modal distributions likely represent unrelated trees, second- and first-degree relatives, respectively.

**Table S1.** Description of field experiments used in single-step genomic evaluation.

| Site      | Trial series               | Population | Number of genotypes tested | Longitude | Latitude | Experimental design |
|-----------|----------------------------|------------|----------------------------|-----------|----------|---------------------|
| Kaingaroa | FR260 <sup>a</sup>         | 260        | 590                        | -38.2805  | 176.7255 | sets-within-reps    |
| Tarawera  | FR260 <sup>a</sup>         | 260        | 656                        | -38.1703  | 176.5289 | sets-within-reps    |
| Woodhill  | FR260 <sup>a</sup>         | 260        | 603                        | -36.5852  | 174.2644 | sets-within-reps    |
| Tarawera  | FR305GF <sup>b</sup>       | 397        | 320                        | -38.1703  | 176.5289 | sets-within-reps    |
| Tarawera  | FR305HD <sup>b</sup>       | 397        | 190                        | -38.1703  | 176.5289 | sets-within-reps    |
| Woodhill  | FR305GF <sup>b</sup>       | 397        | 330                        | -36.5851  | 174.2644 | sets-within-reps    |
| Woodhill  | FR305HD <sup>b</sup>       | 397        | 190                        | -36.5851  | 174.2644 | sets-within-reps    |
| Tarawera  | FR353 <sup>c</sup>         | 399        | 535                        | -38.1734  | 176.527  | incomplete blocks   |
| Kinleith  | FR353 <sup>c</sup>         | 399        | 524                        | -38.2585  | 176.0576 | incomplete blocks   |
| Woodhill  | FR353 <sup>c</sup>         | 399        | 517                        | -36.7252  | 174.3876 | incomplete blocks   |
| Kaingaroa | Cloned Elites <sup>d</sup> | 313/314    | 1282                       | -38.475   | 176.635  | optimal design      |
| Kinleith  | Cloned Elites <sup>d</sup> | 313        | 648                        | -38.3721  | 175.9282 | optimal design      |
| Rotu      | Cloned Elites <sup>d</sup> | 313        | 644                        | -35.8895  | 173.7782 | optimal design      |
| Mohaka    | Cloned Elites <sup>d</sup> | 313        | 539                        | -39.0737  | 176.9772 | optimal design      |

<sup>a</sup> Trial series “FR260” contains 1,849 non-genotyped individuals established through single-pair mating design using 47 parents and planted at three sites as a single tree plot, sets-within-reps design with six replicates.

<sup>b</sup> Trial series “FR305” contains 520 clonally replicated individuals established through single-pair mating design using 64 parents and planted at two sites as a single tree plot, sets-within-reps design with six replicates. The series includes material from parent selected for different traits such as growth and form (“FR305GF”) and wood density (“FR305HD”).

<sup>c</sup> Trial series “FR353” contains 542 clonally replicated individuals established through factorial mating design using 24 parents and planted at three sites as incomplete block design with 5 replicates and 9 incomplete blocks within replicate.

<sup>d</sup> Trial series “Cloned Elites” contains 1,343 clonally replicated individuals planted at 4 sites using an optimal design [1].

**Table S2.** Simulation-based evaluation of parentage assignment using the *apparent* R package (see Materials and Methods).

| Scenario | Family | Number of offspring tested | Statistically significant assignments (%) | Correct assignments based on genetic distance score (%) |
|----------|--------|----------------------------|-------------------------------------------|---------------------------------------------------------|
| 1        | QTL    | 93                         | 92 (99%)                                  | 93 (100%)                                               |
|          | FWK    | 83                         | 83 (100%)                                 | 83 (100%)                                               |
| 2        | QTL    | 93                         | 93 (100%)                                 | 93 (100%)                                               |
|          | FWK    | 83                         | 83 (100%)                                 | 83 (100%)                                               |
| 3        | QTL    | 93                         | 92 (99%)                                  | 93 (100%)                                               |
|          | FWK    | 83                         | 83 (100%)                                 | 83 (100%)                                               |
| 4        | QTL    | 68                         | 3 (4%)                                    | 68 (100%)                                               |
|          | FWK    | 58                         | 56 (97%)                                  | 57 (98%)                                                |

## Reference

- Butler, D. On the optimal design of experiments under the linear mixed model. PhD thesis, The University of Queensland, 2013. <http://espace.library.uq.edu.au/view/UQ:314932>, <http://espace.library.uq.edu.au/view/UQ:314932>.
