# Supplementary material for: Genomics-Enabled Management of Genetic Resources in Radiata Pine
Source: MDPI journal article supplement (doi:10.3390/f13020282), 2022-02-10
Supplement: s1 [file s1]

Archive with 1 entries (1 files):
- forests-1532562-supplementary.pdf
